# Supplementary material for: Pseudomonas ST1 and Pantoea Paga Strains Cohabit in Olive Knots
Source: MDPI journal article supplement (doi:10.3390/microorganisms10081529), 2022-07-28
Supplement: s1 [file s1]

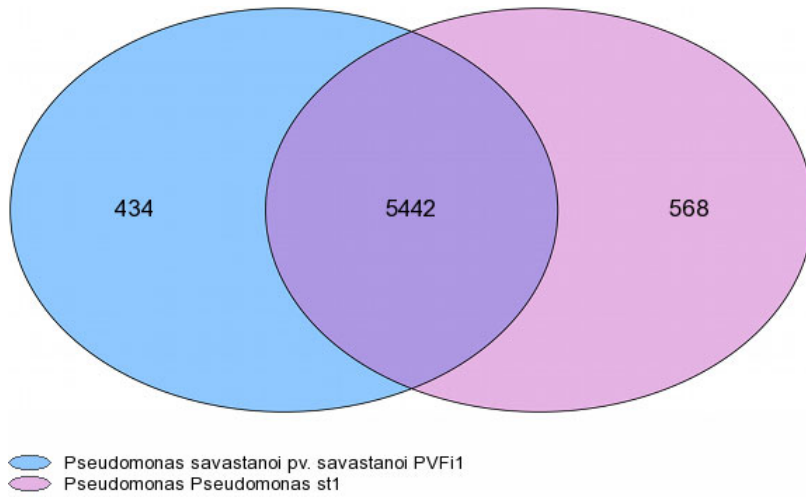

**Figure S2.** Venn diagram showing two genomes (*Pseudomonas* ST1 and *Pseudomonas savastanoi* pv. *savastanoi* PVFi1) with core genome and strain specific genes (Table S3).
